# Supplementary material for: Risk factors for repeat percutaneous coronary intervention in young patients (≤45 years of age) with acute coronary syndrome
Source: PeerJ. 2019 Apr 26;7:e6804. doi: 10.7717/peerj.6804 (PMC6487803; doi:10.7717/peerj.6804)
Supplement: Supplemental Information 1 [file peerj-07-6804-s001.xlsx]

## Sheet: Sheet1
group(1=二次PCI；0=单次PCI)	AGE	SEX	SBP	DBP	HR	BMI	NSTEMI	STEMI	diagnosis	SMOKE	DRINK	DM	HP	MI	C	G	L	H	Cr	UA	ALT	AST	TB	CK	CK-MB	TnT	NT-proBNP	Glu	HbA1C	RBC（	WBC	PLT	CV	TP	albumin	DB	γ-GUT	urine protein（negtive=0）	urine glucose	urine	Hemoglobin	CCB	trimetazidine	aspirin	clopidogrel	statin	ezetmibe	tiger	DAPT
1	38	0	122	81	75	27	1	0	4	1	0	0	0	0	4.09	2.42	2.57	0.66	78.9	404	86.8	43.5	3.5	59.2	1.45	0.069	132.3	4.72	5.4	5.05	9.03	222	12.9	70.3	40.5	1.2	55.4	0	0	0	150	0	1	1	1	1	0	0	1
1	41	0	131	82	94	18	0	1	3	1	0	0	0	0	1.94	0.69	1.15	0.62	82	258.3	139.1	659.1	7.3	8360	513.4	26.2	97.99	7.06	7.18	4.32	11.33	172	12.4	58.3	31.9	6.1	73.6	0	0	5	113	0	1	1	1	1	0	0	1
1	35	0	130	85	62	27	1	0	4	0	0	1	1	0	3.3	2.56	1.85	0.71	91.1	350.6	210.3	80.3	7.3	137.6	1.6	0.003	5	8.01	7.28	4.81	8.2	202	13.3	79.3	46.5	2.2	60.2	0	300	0	144	0	1	1	1	1	0	0	1
1	36	0	114	67	67	25	0	0	2	0	1	1	0	0	4.81	1.41	3.46	0.9	75.1	280.8	8.4	8.1	12.1	35.3	0.9	0.006	93.7	7.69	11.5	4.71	6.97	303	4.71	66.7	37.9	2.7	12	0	0	0	143	1	0	1	1	1	0	0	1
1	41	0	124	52	100	25	1	0	4	1	1	1	1	0	3.82	2.41	2.12	0.63	55	227.9	31.9	178.3	4.1	1376.3	79.43	3.46	195.1	24.75	11.4	5.09	14.9	207	12.6	69.5	44.6	1.9	18.6	0	1000	50	153	0	1	1	1	1	0	0	1
1	41	0	111	72	73	31	0	0	2	1	0	1	1	0	5.26	2.55	3.5	0.79	66.1	257.6	43.8	21.5	9.4	44.9	1.67	0.01		10.5	6.5	4.34	5.33	165	12.6	69.8	43.6	3.1	52.9	0	0	0	135	0	0	1	1	1	0	0	1
1	44	1	106	73	102	24	0	0	2	0	0	0	0	0	5.23	2.09	3.31	1.2	42.9	245.3	108.6	84.4	15	30.7	1.37	0.016	74.72	11.19	10.1	4.91	11.2	226	12.2	81.2	48.5	4	54.4	0	1000	20	148	0	1	1	1	0	1	0	1
1	45	0	138	94	80	24	0	0	2	1	1	0	1	1	4.83	1.45	3.01	1.25	57.1	236.2	33	32.7	11.5	85.2	1.52	0.126	49.14	5.54	4.9	5.32	6.59	210	11.6	72.4	43	4.8	34.1	0	0	5	158	0	1	1	1	1	0	0	1
1	40	0	127	84	88	24	0	1	3	1	1	1	0	1	4.38	1.12	2.99	1.2	78.5	301.9	37	29.2	11.9	239.2	5.16	0.046	1293	6.11	8.7	4.75	7.72	171	13	71.3	45.7	3.1	30.7	0	0	0	148	0	1	1	1	1	0	0	1
1	43	0	107	59	102	36	0	1	3	1	1	0	1	0	3.95	1.28	2.52	0.97	81.9	414.2	131.5	259.2	7.7	3314.1	302.1	16.67	45.5	10.95	5.5	4.32	12.25	270	13.1	66.6	39.9	2.8	120.7	0	0	0	138	0	0	1	1	1	0	0	1
1	45	0	159	79	129	21	0	1	3	1	0	0	0	0	4.59	1.79	2.82	0.67	74.1	486.8	113.8	171.5	18	3647	132	0.701	1434	7.26	7.38	4.75	19.6	264	14.2	68.1	38.7	5	96.5	75	0	5	135	0	1	1	1	1	0	0	1
1	42	0	103	61	76	27	1	0	4	1	1	1	0	0	4.82	4	2.83	0.67	75.3	369.6	119.6	39.4	14	87.2	12.4	2.15		6.8	7.18	5.05	5.51	172	12.5	64.9	44.3	3.7	48.4	0	0	0	153	0	1	1	1	1	0	0	1
1	33	0	110	74	58	30	0	0	2	0	0	0	0	0	4.49	4.3	2.07	0.7	64.2	381.7	31.3	19.8	5.1	73.1	9.5	2.15		6.05	6.4	5.07	8.07	213	13.8	60.6	37.5	2.2		0	0	0	151	0	1	1	1	1	0	0	1
1	30	0	132	75	95	29	0	1	3	1	1	0	0	0	4.45	1.55	2.57	1.43	58.4	349.6	95	366.7	20.4	4413.7	514.5	40.05	134.1	9.74	7.28	4.7	14.11	219	12.7	63.1	43.7	5.9	120.5	0	1000	15	145	0	1	1	1	1	1	0	1
1	43	0	128	75	66	31	1	0	4	1	0	0	0	0	5.26	1.16	3.58	0.89	77.8	366.8	19	21.8	9.3	228.9	15.14	0.144	275.2	6.24	5.1	4.83	9	329	12.5	70.5	43.9	2.4	24.8	0	0	0	143	0	1	1	1	1	1	0	1
1	45	1	134	94	45	27	0	1	3	0	0	1	1	0	2.99	1.51	1.68	0.76	59.8	285	43.2	24.8	19.8	567	2.03	0.088		9.08	6.9	5.11	5.17	177	12.3	67.9	40.3	7.4	18.6				161	0	0	1	1	1	0	0	1
1	44	0	98	55	58	27	0	0	2	0	1	1	0	0	4.53	1.72	3.29	0.9	65	264	19.2	18.1	17.3	113.5	26.4	0.004	13.2	10.39	10.2	5.03	7.18	291	11.7	74.3	48.5	4.1	28.6	0	150	0	168	0	1	1	1	1	0	1	1
1	42	0	124	86	93	31	0	0	2	1	1	1	1	0	6.97	2.34	4.9	0.87	53.1	447.3	71.6	55.6	9.6		45.78	2.15		6.05	8.4	4.39	7.64	333	13.4	64.6	39.1		128.2	25	0	0	124	0	0	1	1	1	0	0	1
1	37	0	103	62	56	23	1	0	4	1	1	0	0	0	3.35	1.62	1.38	1.21	77.4	320.6	40.4	155.4	6.5	1681.6	67.56	3.16		4.54	7.38	4.05	11.08	151	12.1	65.2	42.1	2.6	35.3				142	0	1	1	1	1	0	0	1
1	42	0	120	76	64	29	0	0	2	0	1	0	1	0	5.18	1.61	3.38	0.87	72	337	27	12.1	16.3	38.6	5.67	0.058	50.76	5.37	7.18	5.09	6.95	212	12	66.5	43.6	4.8	40.9	0	0	0	155	0	0	1	1	1	0	0	1
1	42	0	140	71	79	28	0	0	2	0	0	0	1	0	4.76	2.3	2.83	1.23	83	292.3	71.6	25.9	7.4	80.5	1.24	0.006	78.3	4.99	7.28	5.37	7.37	234	12.7	71.8	44.3	1.7	75.6	0	0	0	161	1	0	1	1	1	0	1	1
1	43	0	119	80	74	31	1	0	4	1	1	0	1	0	2.88	1.81	1.47	0.87	86.6	385.9	41.9	22.1	15.1	49.8	14.9	0.006	24.13	4.9	7.38	5.12	9.03	312	12.6	69.4	45.9	5.7	48.9	0	0	0	161	0	1	1	1	1	0	0	1
1	36	0	115	61	60	31	0	0	2	1	1	1	1	0	1.88	1.06	1.04	0.53	67.7	308.6	45.2	18	14.9	33.2	0.53	0.003	16.2	3.95	6.2	4.92	6.92	256	12.7	63.7	41.6	6.1	28.1	0	0	0	154	0	1	1	0	1	0	1	1
1	44	0	121	75	70	24	0	1	3	0	1	0	0	0	5.77	2.53	3.28	1.35			79.9	230.7		5486.6	307.2	8.64		9.24	7.18	5.25	17.48	259	12.4				27.3				164	0	0	1	1	1	0	0	1
1	45	0	138	94	84	33	0	1	3	1	1	0	1	0	6.05	0.84	4.23	1.03	80	402.3	31.8	107.9	23.6	1476.6	213.7	2.03	532.4	7.58	7.28	4.67	7.49	230	12.2	69.1	41.7	7.3	36.5	0	100	0	152	0	1	1	1	1	0	0	1
1	41	0	126	89	74	23	1	0	4	1	0	0	0	0	4.74	3.66	2.83	0.57	76	387.3	64.3	194.8	9.6	1802.4	112.6	3.43	773.2	5.8	7.38	5.3	13.7	231	12.8	63.6	42.7	2.3	58.7	0	0	0	155	0	0	1	1	1	0	0	1
1	42	0	117	70	65	27	0	1	3	1	0	0	0	0	3.38	1.26	2.33	0.67	77.2	429.6	101.1	33.6	8.9	55.6	0.99	0.082	1083	4.63	5.6	4.47	6.42	219	12.6	68.5	38.2	3.2	46.4	0	0	0	145	1	1	1	1	1	1	1	1
1	28	0	147	88	81	26	0	0	2	1	0	0	1	1	3.26	1.81	1.75	0.94	68	396.7	34.3	15.6	16.2	70.9	45.78	2.15		5.06	7.18	4.94	5.31	202	12.3	76.6	44	6.2	21.5	0	300	0	145	0	0	1	1	1	0	0	1
1	44	0	118	74	68	25	0	0	2	1	1	0	1	0	3.09	1.24	1.85	0.95	73.2	293.9	25.9	17.1	9.8	160.2	9.5	0.008	24.22	4.25	7.28	4.25	7.95	244	12.9	58.3	39.4	3.4	27.5	0	0	0	132	1	0	1	1	1	0	0	1
1	34	0	141	85	84	25	0	0	2	1	1	0	1	0	3.47	0.84	2.2	0.98	61.3	265.1	59	71.5	9.2	27	0.85	0.086	338.7	8.64	5.3	4.67	6.32	265	12.3	73.3	43.1	2.9	102.8				145	1	1	1	1	1	0	1	1
1	38	0	112	57	62	23	0	0	2	1	1	0	1	0	3.5	2.02	1.87	0.88	74.6	336.8	36.7	23.5	8.9	65.8	1.61	0.005	43.22	4.87	7.38	4.39	7.67	228	12.8	70.3	45	2.7	115.9	0	0	0	141	0	0	1	1	1	0	0	1
1	45	0	123	67	77	27	0	0	2	1	0	1	0	0	3.24	1.17	2.2	0.74	92.5	366	38.9	12.8	12	79.2	8.2	2.15		6.73	7.6	4.72	8.13	207	11.5	61.8	44.1	3.1	28.4	0	0	0	145	0	0	1	1	1	0	1	1
1	43	0	97	65	64	25	0	1	3	1	0	0	0	0	4.3	1.97	2.65	0.92							45.78	2.15		7.35	7.18													0	0	1	1	1	0	0	1
1	35	0	150	110	85	28	0	0	2	1	0	0	1	0	5.1	0.74	2.81	1.72	79	370.5	21.5	21.3	15.1	170.2	45.78	2.15		6.2	7.28	5.23	7.86	230	13	72.1	44	4.9	24.1	0	0	0	160	0	1	1	1	1	0	0	1
1	38	0	142	88	78	30	0	0	2	1	0	0	1	0	3.88	2.59	2.32	0.7	62.4	399.6	38.7	22.1	14.1	103.6	1.16	0.008	129.6	4.8	7.38	4.73	5.43	218	12.7	69	45.3	4.1	35.7	0	0	0	150	0	1	1	1	1	0	0	1
1	42	0	128	82	72	24	0	0	2	1	1	0	1	0	4.3	1.97	2.65	0.92	75.6	490.3	28.9	17.7	10.4	74.8	2.1	0.01	72.3	6	7.18	5.39	10.86	289	13.2	78.7	40.8	4.2	57.8	0	0	0	146	0	0	1	1	1	0	0	1
1	42	0	100	64	76	26	1	0	4	1	1	0	0	0	7.92	1.65	6.37	1.02	89.7	460.1	59.3	26.8	12.7	92.5	10.2	0.133	2200	4.32	5.6	4.62	3.99	249	12.4	57.2	36.6	4.2	126.7	0	0	0	147	0	0	1	1	1	0	1	1
1	37	0	117	59	59	35	0	0	2	1	1	0	1	0	6.75	3.21	5.45	0.71	61.3	398.5	36.3	22.6	7.8	73.1	1.92	0.003		4.65	5.7	5.16	7.91	255	12.7	74.9	43.5	1.7	83.1	0	0	0	150	0	0	1	1	1	0	0	1
1	38	0	114	72	54	29	0	0	2	1	1	0	1	1	3.31	0.88	1.85	1.15	71.6	336.9	40.3	40.4	7.5	67	1.67	0.003	343.3	4.21	7.28	5.41	5.62	172	13	64.4	41.8	2.6	44.3	0	0	0	168	0	0	1	1	1	0	0	1
1	43	0	125	78	87	27	0	0	2	0	1	1	1	0	3.83	2	2.37	0.72	80.7	395.9	32.9	18.7	23.1	62.3	10.9	0.329	207.6	8.04	7.38	5.65	6.05	190	12.1	67.7	49.1	7.4	93.3	0	0	0	168	1	1	1	1	1	0	0	1
1	44	0	129	69	60	27	0	0	2	1	1	1	1	0	3.01	1.05	1.73	0.89	88.4	350.3	21.8	18.2	9.6	104.2	2.28	0.015		4.32	8.1					57.6	40.8	3.1	52.2	0	0	0		0	1	1	1	1	0	0	1
1	41	0	130	94	76	26	0	0	2	1	0	1	1	0	2.28	1.35	1.02	0.83	85.7	553.4	29	17.3	4.4	49.6	1.29	0.011	889.3	12.48	7.18	5.16	11.84	297	13.8	67	38.2	1.7	51.7	0	0	0	149	0	1	1	1	1	0	0	1
1	45	0	133	79	78	30	0	0	2	1	1	1	1	0	3.72	4.7	1.64	0.7	70.2	293	21.9	12.6	7.3	178.4	4.48	0.012	20.26	13.31	9.1	5	7.6	165	12.4	67.4	42.8	1.8	45.8	0	1000	0	150	0	1	1	1	1	0	0	1
1	41	0	140	80	72	31	0	0	2	1	1	1	1	0	3.82	2.11	2.52	0.65	74.2	355.9	98.8	32.8	11.4	61.1	45.78	2.15		6.18	5.8	5.43	8.37	317	12.1	74.5	43.5	4.1	182.7	25	0	0	165	0	0	1	1	1	0	0	1
1	43	1	160	85	85	35	0	0	2	0	0	0	1	0	2.75	1.41	1.51	0.86	61.7	375.4	77.2	46.2	17	41.9	0.89	0.003	49.9	7.19	5.8	4.97	7.76	214	12.5	87.9	44.3	5.3	36				153	1	1	1	1	1	0	1	1
1	44	1	112	64	102	25	1	0	4	1	0	1	0	0	3.02	1.39	1.54	1.02	48.6	292	36.5	116.9已复查	9.5	1802.9	123.7	3.5	129.5	15.43	9.7	3.65	13.04	218	11.5	51.6	31.9	3.4	23.6	0	1000	0	123	0	1	1	1	1	0	0	1
1	41	0	155	90	80	31	1	0	4	0	0	0	1	1	4.48	1.65	2.87	0.85	81.2	335.5	23.1	17.6	21	65.5	3.33	0.011	865.1	4.96	7.28	5.18	4.93	159	13.4	66.1	40.1	6	28.2	0	0	0	148	0	0	1	1	1	1	0	1
1	41	0	118	80	71	25	0	0	2	1	0	0	0	0	2.44	0.99	0.95	1.14	76.5	251.3	54	25.9	9.9	166.6	2.15	0.003	10.9	6.19	7.38	5.29	8.33	195	13.1	73.4	43.7	5.6	59.3	0	0	0	158	0	1	1	1	1	0	0	1
1	40	0	120	70	70	31	0	0	2	0	1	0	0	0	2.96	1.21	1.44	0.91	63.3	437.4	52.9	31.2	11.6	69.3	1.56	0.003	28.11	5.77	7.18	4.94	6.45	248	12.7	73.1	43.9	4.1	30.5	0	0	0	155	0	1	1	1	1	0	0	1
1	43	0	157	85	57	26	1	0	4	1	0	0	0	0	5.28	0.86	3.73	1.16	55	338.9	22	32.6	6.1	413	12.14	0.343		13.32	7.28	5.01	5.46	215	12.6	73.6	44.6	2.4	53.1	75	1000	15	149	0	0	1	1	1	0	0	1
1	44	0	120	69	70	26	1	0	4	1	1	0	1	0	3.18	1.16	1.77	0.83	73	422.9	105.1	47.6	6.1	90.2	16	2.15	1114	4.57	7.38	4.8	6.17	263	13	65.8	40.4	2.1	59.7	0	0	0	131	0	1	1	1	1	0	0	1
1	45	0	116	63	72	27	0	0	2	0	1	1	1	0	3.41	2.29	1.87	0.7	76.2	374.7	14.8	15.2	23.5	35.6	45.78	2.15		5.3	7.18	5	5.63	172	12.3	68.7	43	7.4	28.4	0	0	0	152	0	1	1	1	1	0	0	1
1	44	0	112	75	58	32	0	1	3	1	1	0	0	0	2.79	1.27	1.37	0.93	81.7	409.6	52.2	41.4	9.1	99.1	20.2	2.15	263.1	4.68	7.28	4.86	4.98	254	12.3	64.6	43.8	3.1	31.8	0	0	0	153	0	0	1	1	1	0	1	1
1	28	0	120	70	75	36	0	1	3	1	1	0	1	0	5.26	1.52	3.16	1.2	96.4	452.8	73.5	208.9	21.1	1445	8.94	2.79	2214	7.5	7.38	4.8	15.44	134	12.7	65.9	37	6	142	75	100	0	132	0	0	1	1	1	0	0	1
1	39	0	120	80	70	30	0	0	2	1	0	0	1	0	6.77	2.58	4.76	0.84	55.6	254.8	34.4	19.9	9	55.2	45.78	2.15		4.72	7.18	5.41	8.79	299	12.6	73.5	46.4	2.4	24.5	0	0	0	160	0	0	1	1	1	0	0	1
1	44	0	112	80	72	30	0	0	2	0	0	0	0	1	4.28	1.07	2.57	1.43	78.5	310.6	16.9	23.3		84.8	2.94	0.01		5.19	7.28	4.62	6.36	238	12.6		41.9			0	0	0	141	0	0	1	1	1	0	0	1
1	45	1	126	84	85	31	0	0	2	0	0	0	1	0	3.31	0.61	1.64	1.34	56.1	181.2	23.6	17.4	13.9	99.5	1.27	0.003	19.21	6.15	5.9	4.85	9.12	324	13.5	75	45.8	3.9	35.8	0	0	0	141	0	1	1	1	1	0	0	1
1	42	0	129	88	96	26	1	0	4	0	0	0	1	0	3.7	0.76	2.31	1.03	77.9		22.9	19.1		834.9	90.28	1.96	593.4	7.35	7.38	4.37	8.34	275	11.9								137	1	1	1	1	1	0	0	1
1	44	0	120	80	60	27	0	0	2	1	0	0	1	1	5.25	1.52	3.41	1.03	76.8	291.1	23.5	17.2	14.8	61.2	45.78	0.003	134.1	5.16	7.18	5	7.02	201	13.3	66.2	42.5	4.2	27.1	0	0	0	154	0	1	1	1	1	0	0	1
1	35	0	131	91	70	27	0	0	2	1	1	0	1	0	3.39	2.38	1.87	0.69	89.9	485.7	37.1	19.9	6.3	66	18.5	2.15		4.26	7.28	5.42	11.65	228	12.7	70.4	45.2	2.1	94.9	0	0	0	170	0	0	1	1	1	0	0	1
1	44	0	128	79	69	31	0	0	2	1	1	0	1	0	5.95	1.67	3.8	1.29	113.3	599.1	47.4	39.8	21.3	141.2	1.27	0.112	97.4	5.31	6.1	5.34	8.3	186	13.8	76.7	44.5	4.8	40.8	150	0	0	167	0	0	1	1	1	0	0	1
1	31	0	140	82	85	35	0	0	2	1	1	0	1	0	2.78	1.14	1.5	0.85	71.9	312.7	26.4	17.2	7.4	84.3	1.05	0.007	91.3	6.68	7.38	4.5	7.3	340	11.6	79.2	60.7	4	71.3	0	0	0	147	1	0	1	1	1	1	1	1
1	37	0	139	103	87	29	0	1	3	0	1	0	1	1	4.9	2.01	2.79	0.71	105.9	467.7	121.6	75.4	13.3	186.5	2.75	0.77	4236	14.04	7.18	5.03	8.39	299	13.6	75.7	44.7	4.6	219.7	150	300	0	169	0	1	1	1	1	0	0	1
1	41	0	122	89	79	26	0	0	2	0	0	1	0	0	5.46	2.6	3.35	0.89	109.4	533.8	121	61.9	10.4	88.7	1.96	0.073	177.8	14.52	10.8	4.79	7.16	156	12.5	74.4	43.2	2.5	212.5	0	0	0	153	0	1	1	1	1	0	0	1
1	41	0	143	76	85	25	1	0	4	0	0	0	0	0	4.47	0.88	3.18	1.03	71.4	274.6	25.8	100.7	13.5	1198.9	44.58	1.99	792	6.59	7.28	4.17	11.1	192	12.8	62.5	38	4.1	13.2	0	0	0	128	0	1	1	1	1	0	0	1
1	40	0	116	70	76	30	0	0	2	1	0	0	0	1	3.58	1.5	2.14	0.83	81.1	424.1	23.3	12.8	13.9	34	1.88	0.012	155.9	5.5	7.38	5.5	8.23	205	13	65.6	39.8	6	33.1	0	0	0	159	0	1	1	1	1	0	0	1
1	42	0	140	84	68	27	0	0	2	1	1	0	0	0	3.92	2.67	2.33	0.76	63.2	248.9	22	13.2	6.6	64.2	0.925	0.007	19.19	4.2	7.18	4.88	7.19	283	13	63.1	37.9	1.3	63.3	0	0	0	151	0	1	1	1	1	0	1	1
1	38	0	133	73	80	30	1	0	4	0	1	1	0	0	4.54	2.35	2.93	0.81	57.8	265.2	25.6	37.5	14.9	325.4	28.2	0.411	227.4	16.39	9.8	4.97	9.31	209	11.8	67.7	44.2	3.6	37.8	10	1000	0	150	0	1	1	1	1	0	0	1
1	45	0	98	59	70	32	0	0	2	1	1	0	1	0	3.21	1.37	2.04	0.63	103.9	378	56	22.3	6.8	65.1	14.9	2.15		5.22	7.28	4.73	5.93	243	13	65.9	40.6	2.5	88.5	0	0	0	142	0	1	1	1	1	0	0	1
1	43	0	113	70	73	31	0	1	3	1	0	0	0	1	5.68	10.28	2.4	0.64	84.1	347.3	9.2	12.4	4.1	46.1	1.95	0.007	714.8	4.89	7.38	5.08	5.07	186	12.2	68	40.7	2.5	19.2	0	0	0	151	0	0	1	1	1	0	0	1
1	40	0	143	88	81	30	0	0	2	1	1	1	1	1	4.79	1.43	3.43	0.7	78.9	290.5	24.7	15	4.7	79.7	1.32	0.007		9.27	7.18	5.06	11.96	190	12.8	75	40.1	1.4	28.6	25	0	0	157	0	1	1	1	1	0	0	1
1	39	0	133	87	78	27	0	1	3	1	1	0	0	0	4.62	6.7	2.12	0.56	68.8	391.3	50.4	20.2	14.4	70.6	12.3	2.15		5.09	7.28	4.12	8.1	206	12	66.1	42.4	2.9	79.6	0	0	0	132	0	0	1	1	0	0	0	1
1	37	0	121	84	88	29	0	0	2	1	1	0	0	0	6.1	2.09	4.31	1.03	76.1	392.6	13.6	13.9	12.5	72.4	1.81	0.088	306.7	5.09	7.38	4.61	8.29	271	12.6	70	37.9	3.1	25.8	0	0	0	145	0	0	1	1	1	0	0	1
1	41	0	108	73	80	28	0	0	2	1	1	0	0	0	2.58	0.97	1.28	1.13	73.8	285.6	142	102.6	10.7	54	0.952	0.012	25.82	4.64	5.5	4.5	8.6	286	11.9	62.5	42.3	4.3	24.1	0	0	0	139	0	1	1	1	1	0	0	1
1	43	0	134	90	78	31	0	0	2	0	0	0	0	0	3.27	1.69	1.69	0.92	71.4	195.4	19.5	17.4	7.1	94.4	2.3	0.003	312.1	8.37	7.18	4.92	6.06	165	13.3	77.7	49.7	3.8	25.5	0	300	0	147	0	0	1	1	1	0	0	1
1	40	0	148	81	90	44	0	0	2	0	1	0	0	0	7.38	1.67	5.29	1.37	62.8	446.8	23.4	6.8	11.3	44.3	45.78	0.009		9.71	7.28	5	13.15	288	12.1	74.9	41.9	2.9	46.5	0	1000	0	152	0	0	1	1	1	0	0	1
1	40	0	116	71	85	24	1	0	4	1	0	1	1	0	4.93	2.37	2.79	0.66	533.2	640.1	23.9	43.5	5.2	459.6	19	13.49	31085	10.04	7.38	3.6	15.23	153	12.8	63	30	2.4	23.6	500	300	15	115	1	1	1	1	1	0	0	1
1	44	0	155	77	77	25	0	0	2	1	1	0	0	0	4.98	2.71	3	0.99	60.3	404.3	27.3	14.2	11.5	64.9	1.81	0.003	5	4.08	7.18	4.84	8.21	274	12.6	66.3	42.9	2.9	127.1	0	0	0	155	0	0	1	1	1	0	0	1
1	39	0	138	88	62	31	0	1	3	1	1	1	0	0	4.36	2.32	2.35	0.89	75.9	421.1	200.8	108.1	11.1	90.2	45.78	0.638		4.95	7.28	4.58	8.06	227	13.1	73.8	41	4.5	572.6	0	0	0	147	0	0	1	1	1	0	0	1
1	45	1	100	58	76	20	0	0	2	0	0	1	1	0	4.2	0.99	2.19	1.57	58.2	218.4	35.5	16.4	26.5	28.6	45.78	2.15		4.9	7.38	4.17	4.88	248	13	67	42.3	8.4	42.1	0	0	0	133	0	0	1	1	1	0	0	1
1	44	0	111	56	92	24	1	0	4	0	0	0	0	0	6.01	2.74	3.71	1.25	69.1	369.1	41.8	109.2	13	1820.3	189.2	5.2	80.53	5.76	7.18	5.2	11.26	231	12.6	63.5	40.8	3.3	30.4				170	0	0	1	1	1	0	0	1
1	39	0	100	60	66	29	0	0	2	1	1	1	0	0	5.79	2.45	3.92	0.88	68.2	382.6	34.3	14.2	8.7	61.7	1.13	0.003	6.67	9.53	7.1	4.71	7.46	208	11.7	63.7	41.7	2.2	49.4	0	0	0	138	0	1	1	1	1	0	0	1
1	45	1	135	79	82	26	0	0	2	0	0	1	1	0	4.35	1.8	2.87	0.8	50.6	193.6	12.4	10.2	14.7	29.8	2.67	0.012	96.62	14.07	7.28	4.71	5.12	188	12.6	70.1	43.5	5.1	22.2	0	1000	0	146	1	1	1	1	1	0	1	1
1	45	0	120	80	80	28	1	0	4	0	0	1	1	0	7.44	2.35	5.32	0.98	76	249.7	117.3	108.8	12	48.1	45.78	0.259		8.38	7	4.79	5.11	189	12	67.5	40.2	3.4	82.4	0	1000	0	150	0	1	1	1	1	0	0	1
1	39	1	145	81	73	29	0	0	2	0	0	0	1	0	4.3	1.97	2.65	0.92							45.78	2.15		7.35	7.38													0	0	1	1	0	0	0	1
1	41	0	126	80	90	26	0	0	2	1	1	0	0	1	4.16	4.05	2.01	0.93	78.3	538.8	57.9	24.3	14.7	42.2	45.78	0.01		6.37	6.2	4.46	6.43	200	13.4	74.5	50.5	5	41.9	0	0	0	141	0	1	1	1	1	0	0	1
1	45	0	148	86	64	29	0	1	3	1	1	0	1	0	4.45	0.41	3.35	1.07	60.9	311.6	52.8	150.3	6.5	2448.8	352.1	15.7	113.3	8.4	7.28	4.81	10.81	216	12.8	68.1	45.8	2	20.6	0	0	5	156	0	1	1	1	1	0	0	1
1	41	0	153	95	72	27	0	0	2	1	0	1	1	0	3.31	1.79	2.11	0.67	91.5	397.2	49.2	19.7	15	88.4	1.37	0.007	132.4	9.83	6.4	4.7	6.26	210	12.3	81.6	48	4.6	58.6	0	0	0	140	0	1	1	1	1	0	1	1
0	45	0	123	79	70	27	1	0	4	1	0	0	0	0	6.54	0.74	4.96	1.44	76.1	389.9	80.8	666.7	6.4	7368	468.5	18.66	104.2	5.56	6.31	4.89	20.1	249	13.2	67.1	39.3	2.3	46.5				150	0	0	1	1	1	0	0	1
0	42	0	143	93	75	24	0	0	2	0	0	0	1	0	4.53	1.68	2.99	0.9	89.7	278.2	24.1	21.3	21.3	72.9	1.69	0.008	10.97	4.27	6.4	5.47	6.13	10.2	12.8	67.2	44.7	6.1	19.2	0	0	0	171	0	0	1	1	1	0	0	1
0	40	0	134	79	87	28	0	0	2	1	0	1	0	1	3.63	2.83	2.07	0.73							40.14	1.49		7.14	10.6	5.2	6.31	235	12					0	1000	0	137	0	1	1	1	1	0	1	1
0	43	1	114	59	64	23	0	0	2	0	0	0	0	1	2.77	1.75	1.43	0.9	56	273.5	24.2	14.8	20.1	86	19.8	0.011	380.6	5.13	6	4.36	8.41	303	12.4	66.9	42.6	6	55.1	0	0	0	133	0	0	1	1	1	0	0	1
0	44	0	133	85	85	30	0	1	3	1	0	0	0	0	5.47	3.01	3.71	0.76	91.1	525.8	30.5	47.3	17.8	486.1	27.81	0.436	44.6	7.48	5.4	4.96	7.35	119	13.7	68.4	42.7	3.9	63	0	0	0	152	0	1	1	1	1	0	1	1
0	44	0	125	78	81	24	0	1	3	1	0	0	1	0	4.81	1.84	3.22	1.16	75.5	275.6	123.2	81.4	13.3	63	14.6	0.122	135.4	6.31	6.5	4.22	5.51	229	12.5	57.2	38.8	2	69	0	0	0	129	1	0	1	1	0	1	0	1
0	44	0	129	78	104	28	1	0	4	1	1	0	1	0	4.83	3.28	2.7	1.03	95.3	392.6	56.1	25.5	11.8	61.1	2.74	0.028	390	8.04	6.6	5.13	7.9	209	13.6	75.8	50.3	4.4	52.3	0	0	0	161	0	0	1	1	1	0	0	1
0	43	0	128	72	70	29	0	0	2	1	1	1	1	1	3.6	2.31	2.1	0.6	100.3	329.3	99.4	39.5	11.3	125.8	14.5	1.49		10.42	6.7	4.94	9.37	200	13.8	69.3	41.9	3.4	41.9	25	100	0	142	0	1	1	1	1	0	0	1
0	40	1	114	62	88	27	0	0	2	0	0	1	1	0	2.71	0.8	1.35	1.2	56.2	204.6	24.1	9.4	10.5	34.3	0.534	0.005	36.74	9.75	8.2	4.46	4.51	237	12.7	57.6	40.5	3.7	31.2	0	200	0	133	0	1	1	1	0	1	0	1
0	45	0	102	60	60	26	0	0	2	1	1	0	0	0	4.93	2.02	3.35	0.86	74.6	337.4	38.1	20.7	10.9	139.6	40.14	1.49		5.02	6.31	4.68	4.8	240	12	75.5	44.2	3.3	85.6	0	0	0	147	0	1	1	1	1	0	0	1
0	44	0	129	82	70	27	1	0	4	1	1	0	1	0	4.8	2.75	3.2	0.9	82.9	361.7	36.7	38.5	10.6	372.6	35.14	0.363	166.8	4.71	5.2	4.69	9.38	208	12.7	71.3	40.6	2.4	38.9	10	0	0	147	1	1	1	1	1	0	0	1
0	43	0	109	65	57	25	0	1	3	0	1	0	1	0	3.45	2.55	1.93	0.88	82.7	371.2	16.5	70.8	17.6	796.2	74.55	0.427	506.9	5.21	5.4	4.67	7.36	211	12.9	71.9	38.8	3.1	52.6				151	1	0	1	1	1	1	0	1
0	29	0	158	84	79	31	0	1	3	1	1	1	1	0	4.2	3.04	2.73	0.74	85.5	491.1	59.8	30.1	8.2	88.2	1.66	0.022	157.8	5.29	9.1	5.09	8.09	315	11.6	66.4	45	2.7	62.9	0	0	0	143	0	1	1	1	1	0	1	1
0	42	0	127	88	86	25	0	0	2	1	1	0	0	0	4.19	1.35	2.65	1.04	58.1	279.5	37.9	41.2	12.7	165.1	2.51	0.006	192.5	6.6	6.41	4.61	5.08	169	12.6	73.4	42.9	2.6	27.6	20	0	0	136	0	1	1	0	1	0	1	1
0	35	0	140	90	66	28	0	1	3	1	1	0	1	0	4.71	7.57	1.51	0.69	82.4	436.7	55.6	59.3	13.6	467.6	13.32	0.589	817.1	5.35	6.51	4.37	6.75	208	12.3	77.7	48	2.7	164.7	25	0	0	139	0	1	1	1	1	0	0	1
0	45	0	130	80	90	29	1	0	4	1	1	1	0	0	4.2	1.97	2.61	0.93	63.8	202.4	71.9	215	16.4	1834.4	63.98	3.62	10645	10.91	6.6	4.5	13.53	179	13.2	64.1	38	6.7	65	0	100	0	138	0	1	1	1	1	0	0	1
0	45	0	135	89	71	20	0	1	3	1	1	0	1	0	4.1	1.87	2.51	0.93	72.5	297.9	15.5	38.5	13.4	547.8	23.2	0.335	387.1	5.43	6.61	4.12	9.7	222	11.9	67.1	42.4	3.9	19.4				139	1	1	1	1	1	0	0	1
0	44	0	143	82	82	27	0	0	2	1	1	0	1	0	5.41	2.78	3.52	1.02	75.8	502.4	99.6	46.8	16.7	140.6	1.56	0.011	43.4	6.35	6.71	4.4	3.99	178	12.2	64.8	39.8	3.2	160	0	0	0	144	0	1	1	1	0	1	0	1
0	36	0	105	70	60	23	1	0	4	1	0	1	0	0	3.03	1.73	1.59	0.9	70.9	268.5	60.4	20.8	14.3	26.9	40.14	0.051		12.82	9.9	5.71	7.39	225	12.1	70.4	46.1	4.5	37.5	0	300	0	172	0	1	1	1	1	0	0	1
0	44	0	122	71	69	35	0	0	2	1	0	1	1	0	3.88	3.47	1.71	0.73	74.4	274.5	21.4	14.9	9	87.5	11.7	0.053	188.3	8	10	4.41	6.05	220	12.7	65.6	40.4	2.9	60.5	0	300	0	136	0	1	0	0	1	0	0	0
0	45	0	124	71	93	23	0	1	3	0	0	0	1	1	2.57	1.15	1.3	0.88	67.3	161	95.4	355	9.8	5435.5	387.8	24.95	591.9	7.03	6.4	4.69	14.2	381	15.8	65.6	355	3	18.4	10	70	60	127	0	1	1	1	1	0	1	1
0	40	0	138	84	74	26	0	0	2	1	1	0	1	1	4.3	2.07	2.71	0.93	78	437.6	25.2	12	6.3	81.5	1.98	0.007	23.49	6.92	6.42	4.66	6.96	232	12.1	74.1	44.3	3.7	47.1	0	0	0	134	1	0	1	1	1	0	0	1
0	43	0	105	79	74	24	0	0	2	1	1	0	0	0	5.06	2.52	3.05	1	77	403.5	26	18	4.9	81	2.11	0.003	19.7	5.89	6.52	5.18	10.34	287	11.7	74.3	44.8	4	36	0	0	5	158	0	1	1	1	1	0	0	1
0	42	0	146	92	63	28	0	0	2	1	1	0	1	0	4.51	1.34	3.36	0.71	66.6	448.3	68.2	51.7	10.2	55.9	1.56	0.005	39.9	5.6	6.62	5.26	6.89	273	12.3	73.3	42.4	2.5	43.5				146	0	1	1	1	1	0	0	1
0	36	0	128	80	81	27	0	1	3	1	1	0	1	0	4.2	1.97	2.61	0.93	62.5	417.6	89.9	521.6	14.2	6121.7	561.4	14.55	110.7	7.88	5	4.43	18.43	300	12.7	69	47.1	3.1	47.7	25	0	0	137	1	1	1	1	1	0	1	1
0	42	0	140	84	85	28	0	0	2	0	1	1	0	1	3.97	4.17	1.8	0.8	72.5	465.2	24.2	14	12.9	79.9	13.3	1.49		6.43	5.8	5.3	5.73	151	12.2	67.8	46	3.1	25.3				160	0	1	1	1	1	0	0	1
0	38	0	122	84	84	31	0	0	2	0	0	0	1	0	1.93	0.88	0.8	0.73	58.4	433.4	20.8	15.4	10.2	42.4	11.8	1.49		4.9	6.72	4.21	6.12	220	13.3	73.9	41.5	4.3	17.3	25	0	0	121	0	1	1	1	1	0	0	1
0	37	0	114	69	83	33	1	0	4	1	1	0	0	0	4.1	1.87	2.51	0.93	108.4	346.1	47.7	84.1	17	559.7	11.91	3.88	2479	7.56	6.4	4.68	13.17	231	12	61.9	35.1	4.8	45.2	0	100	0	153	1	1	1	1	1	0	0	1
0	45	0	135	89	67	23	0	0	2	1	0	0	1	0	3.13	1.46	1.84	0.71	73.6	335.5	21.2	15.5	6.2	52.9	1.71	0.01		7.51	6.5	5.11	4.84	188	12	76.6	43.6	2	27.2	0	0	0	155	0	1	1	1	1	0	0	1
0	29	0	139	81	83	27	0	0	2	0	0	0	1	0	4.3	2.07	2.71	0.93	79.9	433.9	12	7.6	7.3	76.6	1.88	0.007	93.9	5.55	6.6	4.99	8.68	245	12	70	41.9	2.6	12.5	0	0	0	146	0	0	1	1	1	0	0	1
0	42	0	143	89	84	23	0	1	3	0	0	0	0	0	4.2	1.97	2.61	0.93	73.9	305.7	85.9	28.8	7	163	0.66	0.005	36.2	5.89	5.5	5.32	8.54	345	13.1	75.5	47.2	1.8	38.7	0	0	0	158	0	1	1	1	1	0	0	1
0	42	0	129	89	70	29	0	0	2	1	0	0	0	1	7.59	1.45	5.88	0.81	85.4	342.9	41.6	16.9	8.3	39.6	0.962	0.018	469	7.19	6.7	5.67	9.77	218	12.7	73	48.6	2.3	43	0	0	0	171	0	0	1	1	1	0	0	1
0	38	0	100	80	80	25	0	0	2	1	1	1	0	0	4.88	1.18	3.48	1.08	46	230.7	64.7	56.4	14.9	30.4	2.55	0.01	5.8	15.91	6.41	5.29	6.39	224	12.7	68.2	43.5	4.5	18.4	0	300	0	164	0	0	1	1	1	0	0	1
0	44	0	109	54	80	26	0	0	2	1	0	0	0	0	5.71	7.86	2.18	0.73	75.7	293.1	49.8	31.7	6.6	80	1.04	0.006	51.9	12.56	6.51	4.33	6.06	259	12.2	68.8	42.4	1.1	28.7				132	1	1	1	1	1	0	0	1
0	27	0	141	87	130	39	0	1	3	1	1	0	1	0	3.77	3.11	2.01	0.74	56.6	403.1	48.3	42.6	17.6	152.5	18.5	1.49		5.98	5.7	4.55	6.59	227	11.9	66	43.5	4.9	212.2	0	0	0	140	0	1	1	1	1	0	1	1
0	37	0	120	80	48	32	0	0	2	1	0	0	0	0	3.68	1.49	2.27	0.77	74.8	342.1	85.5	61.3	7.6	71.4	40.14	1.49		5.16	5.8	5.58	5.34	215	12.4	68.3	39.2	3.1	50.4	0	0	0	166	0	0	1	1	1	0	0	1
0	35	0	142	99	57	30	0	0	2	1	0	0	1	0	3.14	2.63	1.65	0.72	74.7	415.9	24.9	16.4	12	71.6	1.61	0.295	225.9	5.01	6.61	5.14	7.02	241	12.4	73.3	46.2	3.6	26.6	0	0	0	161	0	1	1	1	1	0	0	1
0	28	0	78	38	124	21	0	1	3	1	0	0	0	0	5.41	0.9	5.54	0.68	88.6	425.6	82.8	370.9	26.6	4220.2	561.2	11.88	828	18.53	5.7	4.38	10.89	281	12.2	66.8	32.8	3.3	104.6	0	0	15	134	0	1	1	1	1	1	0	1
0	44	0	133	70	70	25	0	0	2	1	0	1	1	0	3.43	1.44	2.17	0.81	71.3	399.1	43.3	22.7	18.8	37.7	0.86	0.12	124.6	6.69	6.71	5.18	11.32	133	12.6	73.2	39.5	6.8	21.6	0	0	0	162	0	0	1	1	1	0	1	1
0	45	0	125	75	80	26	0	1	3	1	0	0	0	0	3.64	0.91	2.19	1.06	59.6	343	26.8	16.9	5.6	51.4	1.43	0.007	239.9	4.83	6.42	4.48	10.1	330	12.8	67.1	41.3	1.4	65.4	0	0	0	144	0	1	1	1	1	0	0	1
0	36	0	174	120	72	38	0	0	2	1	0	0	1	1	4.1	1.87	2.51	0.93	1056.3	539.1	52.2	30.7	2.5	51.4	1.93	0.479	27355	5.3	6.52	3.6	13.2	265	12.5	81.5	43.5	1.2	57.7	75	0	0	107	0	1	1	1	1	0	0	1
0	38	0	130	83	73	29	0	0	2	1	1	0	0	1	3.02	2.04	1.51	1.1	88.5	354	107.5	65.9	8.2	89.7	1.91	0.009	183.5	7.27	5.4	4.64	8.24	230	11.9	68.8	44.9	1.9	40.9	10	0	0	162	0	1	1	1	1	0	0	1
0	32	0	138	90	96	26	0	1	3	1	0	0	1	0	3.95	1.32	2.51	1.04	75.1	359.1	37.2	18.8	8.9	64.3	1.45	0.011	140.3	7.54	6.62	5.52	5.62	206	12.4	73.9	47.5	3.5	69.5	0	0	0	163	0	0	1	1	1	0	0	1
0	37	0	118	73	72	27	0	0	2	1	1	0	1	0	4.09	2.9	2.53	0.59	73	301.6	34.3	20	6.7	129.5	18.6	0.009	13	5.5	7	4.68	7.75	179	12	65.1	39.3	1.8	33.1	10	300	0	149	0	0	1	1	1	0	0	1
0	44	0	126	77	79	25	1	0	4	1	0	0	1	0	3.71	0.98	2.13	1.29						156	18.23	0.406	477.9	5.22	6.72								71.8					0	0	1	1	1	0	0	1
0	38	0	115	66	70	29	0	1	3	1	1	0	1	0	5.62	2.08	4.04	0.87	73	366.2	36	79.2	23.6	1111	63.46	0.387	460.9	8.06	5.7	4.31	11.27	323	13.3	64.2	43.4	5.2	28	0	0	15	119	0	1	1	0	1	0	1	1
0	44	0	110	62	80	27	0	1	3	0	0	0	0	0	4.71	3.1	2.99	0.71	79.8	378.6	186.3	98.2	10.6	46.4	1.55	0.096	185.5	9.67	5.5	5.37	6.77	256	12.4	67.9	41.1	3.5	150.3				166	0	1	1	1	1	0	1	1
0	42	0	131	90	81	26	0	0	2	1	1	1	1	0	3.91	2.06	2.6	0.79	68.5	371.9	20.7	12.4	17.5	82.1	1	0.006	24.3	12.19	10.1	5.08	6.72	209	12.5	69.7	42.5	4.4	27.9	30	500	0	155	1	1	1	1	1	1	1	1
0	39	0	120	66	74	23	0	1	3	1	1	0	0	0	4.3	2.07	2.71	0.93	67.3	245.7	74.8	126.2	26.6	1235.6	111.5	1.1	666.7	5.32	6.4	5.16	11.44	325	12.4	70.8	46.3	9.4	79.4	25	0	5	158	0	1	1	1	0	0	0	1
0	37	0	104	70	78	30	0	0	2	1	1	0	0	0	4.2	1.97	2.61	0.93	86.7	327.6	59.8	26.3	15.5	161.1	2.09	0.003	13.2	10.8	6.5	5.45	9.06	200	13.9	66.9	44.9	5.6	104.4	0	0	0	156	0	1	1	1	1	0	0	1
0	43	0	130	69	83	27	0	0	2	1	1	1	1	0	3.82	2.55	2.17	0.86	76.1	420.5	38.7	24.1	8.3	82.2	40.14	1.49		4.56	6.6	5.25	10.94	270	13.1	71.3	44	3	65.8	0	0	0	164	0	1	1	1	1	0	0	1
0	37	0	167	89	75	32	0	0	2	0	1	1	1	0	3.52	2.25	2.04	0.56	87.2	562	16.4	17.1	8.5	61.9	3.47	0.079	8036	12.37	9.4	4.81	8.48	291	13.7	74.6	38.4	5.8	15.2	25	0	0	130	0	1	1	1	1	0	0	1
0	39	0	101	69	58	33	0	0	2	1	0	0	0	1	4.88	2.56	3	0.98	82.9	389.3	54.7	26.3	17.6	54.5	10.2	0.009	204.4	4.87	6.1	5.27	6.87	186	12.3	65.4	44.4	4.4	57.5	0	0	0	154	0	1	1	1	1	0	0	1
0	42	1	104	69	75	24	0	0	2	0	0	0	1	0	4.12	1.12	2.44	1.22	68.5	306.4	13.1	14	6.1	54.4	0.723	0.006	20.28	4.98	6.7	4.52	7.92	306	13	75	44.3	1.8	13.1	0	0	0	137	1	0	1	1	1	0	0	1
0	42	0	152	90	76	35	0	1	3	0	0	0	0	0	3.78	1.47	2.43	0.71	79.1	403.8	16.3	12	12.5	50.7	0.956	0.007	206.6	4.84	5.4	5.37	9.94	325	13.5	76.7	45.8	3.9	27.9	0	0	0	136	0	1	1	1	1	0	0	1
0	44	0	122	84	78	32	1	0	4	1	0	0	1	0	3.79	0.84	2.3	0.98	87.9	430.6	189.4	78	15.1	96.9	1.86	0.015	831.5	7.8	5.1	5.17	6.81	238	12.7	74.7	43.6	4.2	41.4	0	0	0	150	0	1	1	1	1	0	0	1
0	34	0	138	79	63	26	0	0	2	0	1	1	0	0	3.15	1.46	2.14	0.57	77.8	214.1	40.6	16.4	10.1	103.2	1.06	0.004	17.9	14.25	8.3	5.03	8.16	158	12	70	45.8	3.3	50.1	10	200	0	155	0	1	1	1	1	0	0	1
0	45	0	118	73	135	29	0	0	2	1	1	0	1	0	2.85	1.38	1.42	0.99	192.4	817.6	44	56.6	28.3	139.3	2.05	0.06	2531	9.27	6.3	5.45	12.32	171	13	91.1	46.3		83.7	70	0	0	163	0	1	1	1	1	0	0	1
0	31	0	151	86	85	26	0	0	2	1	1	0	0	0	3.31	2.03	1.63	1.12	84.6	385.6	338.2	153.2	7.9	89.8	0.79	0.004	27	7.99	6.41	5.48	7.5	176	12.3	62.4	43.8	2.8	217.9	10	0	0	158	0	1	1	1	1	0	1	1
0	43	1	108	70	80	23	0	1	3	0	0	0	1	0	2.53	1.41	1.26	0.8	47	209	30.5	76	11.1	484.3	53.52	0.452	1068	10.13	6.51	4.78	9.48	332	15	70.5	35.6	1.8	57.5	25	0	150	104	0	1	1	1	1	0	0	1
0	44	0	131	90	89	26	0	0	2	1	1	1	1	0	3.9	3.17	2.12	0.77	74.2	413.2	57.2	40.3	7.9	93.2	2.41	0.01	98.54	16.48	9.1	4.8	9.09	245	12.2	67.9	40.8	5.3	79.2	0	0	0	147	0	1	1	1	1	0	0	1
0	37	0	110	62	80	26	0	0	2	1	1	0	0	0	4.1	1.87	2.51	0.93	73.3	495.6	59.5	28.7	10.3	57.7	0.722	0.012	31.37	4.76	6.61	4.92	8.43	165	11.9	72	46.2	5.3	96.7				152	0	0	1	1	1	0	0	1
0	43	0	123	85	77	25	0	0	2	1	1	0	0	0	4.79	1.09	3.09	1.3	68.4	281.3	15.2	18.8	11.5	68.2	1.27	0.005	20.39	4.45	6.71	4.62	5.44	305	13.2	80.9	48	2.4	165.6	25	0	0	154	0	1	1	1	1	0	0	1
0	44	1	106	65	61	27	0	0	2	0	0	0	1	0	3.36	2.07	1.95	1.01	58	182.4	15.4	12.3	4.4	68.9	40.14	1.49		5.15	5.6	4.03	7.52	226	14	58.7	41.4	1.5					119	1	0	1	1	1	0	0	1
0	34	0	128	80	110	37	1	0	4	1	0	0	0	0	5.04	2.01	2.95	1.59	89.9	264.8	74.8	154.5	26.9	1237	40.83	2.96	522.3	5.91	5	5.49	17.25	316	12.2	76.1	45.3	8.9	57.6	25	100	5	170	0	1	1	1	1	0	1	1
0	33	0	117	85	84	26	0	0	2	1	1	0	0	0	4.41	1.46	3.19	0.86	78	426.2	20.8	14.3	9.2	89.4	0.67	0.003	12.7	4.83	5.2	4.74	7.87	239	11.6	78.6	49.1	2.6	28.2	0	0	0	154	1	1	1	1	1	0	0	1
0	35	0	115	66	70	25	0	1	3	1	0	0	0	0	4.28	1.65	2.42	1.13	81.3	247.6	37	26	9.7	43.5	7.6	1.49		4.16	6.42	4.8	7.43	209	13.2	66.7	42.7	3	20.9	0	0	0	160	1	0	1	1	1	1	0	1
0	40	0	122	71	60	26	0	0	2	1	1	0	0	0	4.29	1.52	2.88	0.73	66.3	358.2	58.7	31.7	4.3	279.5	1.42	0.007	12.32	11.88	6.52	4.79	6.82	176	12.9	69.8	43.1	0.8	45.3	0	0	5	150	0	0	1	1	1	0	0	1
0	43	0	131	84	88	28	0	0	2	0	0	0	0	0	4.3	1.87	2.71	0.93	77.2	405.8	142.9	42	26.2	32.7	0.54	0.005	74.6	5.83	6.62	5.27	10.2	328	14.6	80.6	48.3	7.6	356				162	0	1	1	1	1	0	1	1
0	36	0	141	103	78	31	1	0	4	1	1	0	1	0	3.21	1.21	1.98	0.67	77	317.3	113.4	29.3	9.7	85.1	2.23	0.094	710.4	5.72	6.72	4.69	6.69	408	12.2	80.1	44.9	4.3	106.2	0	0	0	144	0	1	1	1	1	0	0	1
0	45	0	114	65	83	22	1	0	4	0	1	0	0	0	4.2	2.07	2.61	0.93	60	283.4	118.9	29.3	6.6	43.6	1.1	0.016	441.7	5.39	6.4	3.34	6.41	322	14.4	66.6	39	3	84.3	0	0	0	106	0	1	1	1	1	0	0	1
0	41	0	139	79	70	33	0	1	3	1	0	0	1	0	3.53	2.37	1.84	0.97	73.6	286	19	16.9	7.9	69.2	2.7	0.007	235.2	5.89	6.5	5.44	9.24	220	13.1	71.4	46	4.4	15.4	0	0	0	160	1	1	1	1	1	0	0	1
0	40	0	142	95	78	33	0	0	2	1	1	1	1	0	3.86	2.61	2.1	0.6	76.5	396.1	59.4	44.8	5.9	63.3	1.01	0.004	46.47	17.05	11	5.15	6.42	242	12.3	79.4	39.5	1.9	336.3				155	0	0	1	1	1	0	0	1
0	41	0	100	58	68	23	0	0	2	1	1	0	0	0	4.37	1.21	2.82	0.91	72	320.8	74.6	43.3	12.9	61.2	10	0.005	91.63	5.62	6.6	4.54	5.55	214	11.5	68.4	43.8	4.4	74.2	0	0	0	153	0	0	1	1	1	0	0	1
0	43	0	109	69	59	28	0	0	2	1	0	1	0	0	3.26	1.07	1.95	0.9	83.2	381.8	114.3	38.8	14.4	61	11	1.49		5.72	6.7	4.33	6.6	178	13	67.5	43.4	5.5	55.7	0	0	0	145	0	0	1	1	1	0	0	1
0	42	0	134	75	63	30	0	0	2	1	1	1	1	0	3.47	1.04	2.32	0.75	57.9	197.7	26.1	14	7.6	50.5	1.38	0.003	166.9	12.7	6.41	4.53	6.45	208	11.2	65.6	43.2	2.5	56.4	0	50	0	146	0	0	1	1	1	0	0	1
0	40	0	129	88	84	29	0	0	2	1	1	0	0	0	4.99	3.89	3.07	0.93	67.5	363.6	41.5已复查	20.5	9.6	83.2	1.28	0.013	15.48	5.1	6.51	4.75	5.5	237	13.5	73.1	42.7	2.7	206	0	0	0	165	0	1	1	1	1	0	0	1
0	43	0	160	92	78	28	0	0	2	0	0	0	1	0	7.49	2.42	5.13	1.22	93	551.9	15.4	14.3	13.9	82.1	1.57	0.037	71.33	8.57	5.9	4.64	5.8	289	12.5	67.8	43.6	3.6	32.6	0	0	0	144	0	1	1	1	1	0	0	1
0	36	0	113	68	80	32	0	0	2	1	1	0	0	1	4.38	1.31	2.88	0.81	61.2	389.3	18.6	11.7	11.2	45	12.5	1.49		4.69	6.61	5.06	5.34	179	12.1	66.5	44	3.4	18.9				165	0	0	1	1	1	1	0	1
0	39	0	120	68	70	24	0	0	2	1	0	0	0	1	2.8	1.28	1.6	0.71	70	347.9	31.5	17	13.9	72.9	2.61	0.017	718.4	4.61	6.71	4.21	5.23	194	13.1	60.4	39.5	5.5		0	0	0	137	0	1	1	1	1	0	0	1
0	42	0	149	83	57	30	1	0	4	1	0	0	1	0	2.45	1.74	1.29	0.7	86.7	331.4	21.6	10.9	12.4	107.1	1.66	0.047	56.3	4.22	6.42	4.74	4.65	142	12.7	63.5	49.9	4.2	22.7	0	0	0	150	0	1	1	1	1	0	0	1
0	31	0	141	77	80	49	0	1	3	1	0	0	0	0	6.58	1.73	4.54	0.96	62.2	370.6	69.8	134.9溶血	15.2	1503	178.7	2.49	219.8	6.76	6.52	4.91	12.04	283	12.6	78.1	42.2	6.8	23.3				150	0	1	1	1	1	0	0	1
0	40	0	108	68	69	28	1	0	4	1	1	1	1	0	4.5	1.19	2.68	1.37	63.7	200.9	43.9	331.9	6.9	4281.6	254.8	11.9	120.6	11.54	5.9	4.38	11.14	262	13.1	60.5	41.8	2.1		0	50	0	132	0	1	1	1	1	0	0	1
0	40	0	131	76	67	28	0	0	2	1	1	0	0	0	3.49	2.29	2.17	0.61	73.4	286.4	24.8	14.2	16.4	66.1	21.1	1.49		4.11	6.62	4.24	9.55	181	12.1	58.7	38.2	4.6	16.8	0	0	0	134	0	0	1	1	1	0	0	1
0	45	0	124	64	80	25	1	0	4	1	1	1	1	0	2.79	2.42	1.49	0.58	48.6	302.1	31.3	16.5	11	53.4	1.7	0.01	158.8	10.63	6.72	4.76	5.52	184	12.8	68.1	46.7	3.9		0	1000	0	151	0	1	1	1	1	0	0	1
0	44	0	126	88	64	23	0	0	2	1	1	1	0	1	4.02	1.1	2.09	1.72	61	302.8	31.9	19.1	13.3	39.9	15	0.01		7.84	8.5	4.97	5.95	187	12	67	48			0	0	0	153	1	1	1	1	1	0	0	1
0	42	0	103	80	82	27	0	1	3	0	1	0	0	0	4.84	1.13	3.49	1.11	61.9	335.5	30.5	126.8	13.6	1590	121.8	6.33	1456	7	5.8	4.65	11.95	200	12.2	62.8	41.3	4.6	13.3	75	0	15	120	0	1	1	1	1	0	0	1
0	39	0	120	79	44	29	0	0	2	1	1	0	1	0	3.56	1.42	2.19	0.9	72.1	252.7	68.2	30.5	6.9	106.3	1.88	0.006	91.5	6.47	5.7	5.04	9.11	203	12.1	72.2	44	2.6	68.7	0	0	0	162	0	1	1	1	1	0	1	1
0	39	0	122	79	83	23	0	0	2	0	1	0	1	0	2.85	0.99	1.47	1.2	187.1	506			8.8	36.6	0.884	0.017	145.1	4.61	5.4	4.83	7.13	240	15.2	63.6	39.6	3.8	25.8	25	0	0	125	0	1	1	1	1	0	0	1
0	34	0	135	78	93	28	1	0	4	0	0	0	1	0	4.1	1.97	2.51	0.93	74	527.1	59.1	30.5	7.3	85.9	4.11	0.298	1157	5.18	6.4	4.82	7.03	212	12.3	74.6	45.5	2.2	119.3	0	0	0	144	0	0	1	1	1	0	0	1
0	44	0	113	63	78	27	0	0	2	1	1	1	1	0	4.3	1.87	2.71	0.93	42.1	360.9	57.2	49.6	5.8	143.1	1.82	0.005	80.8	6.89	7	4.77	7.51	313	12.4	66.4	44	1.2	76.7	0	0	0	141	0	1	1	1	0	0	0	1
0	43	0	120	72	70	26	0	0	2	1	1	0	0	0	5.48	1.52	3.83	0.99	67.6	413.3	36.3	37.3	12.5	234.9	3.17	0.735	195.5	6.8	4.8	4.91	5.4	222	10	71.6	42.3	3.9	71.3	0	0	0	147	0	1	1	1	1	1	0	1
0	30	0	135	82	65	25	0	0	2	0	0	0	0	0	4.39	1.11	3.26	0.79	82.7	466.5	29.4	17	12.4	62.5	0.87	0.004	15.4	4.43	5.4	4.89	5.36	236	12.7	69.9	57.9	3.5	14	0	0	0	145	0	1	1	1	1	0	1	1
0	44	0	125	67	90	32	0	0	2	1	1	0	0	1	6.14	1.72	4.5	0.88	63.4	299.2	30.4	17.6	10.3	96	20.9	1.49	35.29	5.94	6.5	4.66	5.69	224	12.6	62.9	44.9	3	37.1	0	0	0	146	0	0	1	1	1	1	0	1
0	45	1	150	90	94	31	0	0	2	0	0	1	0	0	5.58	1.18	3.6	1.56	47.6	193.2	22.6	15.8	14.1	36.6	40.14	1.49		11.67	6.6	4.18	5.85	240	12.3	81.8	45	4.1	27.5	0	100	0	130	0	0	1	1	1	0	0	1
0	42	0	134	86	66	25	0	0	2	1	1	1	1	1	4.33	1.56	2.8	0.64	143.9	436.4	17.2	12.6	4.7	68.7	1.61	0.003	127.5	4.86	6.4	4.18	7.62	167	14.1	78.1	45.8	1.7	23.4	75	0	0	126	0	1	1	1	1	0	0	1
0	40	0	121	63	68	23	0	0	2	0	1	0	0	0	4.2	2.07	2.61	0.93	66.6	284.4	18.3	17.2	7.6	67.7	0.627	0.006	6.33	5.11	6.7	4.79	5.16	235	12	74.2	50.2	3.4	22.1	0	0	0	143	0	0	1	1	1	0	0	1
0	40	0	112	64	125	26	0	0	2	1	1	0	1	1	5.13	1.67	3.22	1.09	73.6	340.7	22.5	17.3	13.4	80.1	40.14	1.49		4.94	6.41	4.96	6.69	142	11.8	68.2	44	4.5	24	0	0	5	156	0	1	1	1	1	0	0	1
0	34	0	131	74	80	30	0	0	2	1	1	0	1	0	2.88	0.89	1.87	0.7	68.5	398.3	17.9	14.6	8.5	104	1.07	0.005	11	8.61	5.5	4.01	6.12	173	11.9	64.5	42.5	2.7	18.4	0	0	0	143	0	1	1	1	1	0	0	1
0	38	0	116	78	75	28	0	0	2	0	1	0	1	0	4.1	1.87	2.51	0.93	75	413.1	30.7	19.2	13.3	86.1	1.15	0.003	26.8	6.11	6.51	5.24	5.69	288	12.8	77.9	46.8	4.8	23.1	20	0	0	154	0	0	1	1	1	0	0	1
0	33	0	101	59	90	32	1	0	4	0	1	0	1	0	4.55	1.2	3.11	0.96	85.9	487.7	133	302.7	16.5	3916.4	310.7	28	110.6	6.81	5.4	4.62	16.37	258	12.9	69	40.7	5.8	72	20	0	0	131	0	1	1	0	1	1	1	1
0	42	0	132	67	75	22	0	0	2	0	0	0	0	0	3.81	0.7	2.72	0.84	96.9	374.5	13.3	13.3	13.6	91.4	10.7	0.007	20.81	4.66	5.4	4.54	4.66	154	12.5	63.2	42.9	3.8	13.8	0	0	0	145	0	0	1	1	1	0	0	1
0	42	0	136	84	74	26	0	0	2	1	0	0	0	0	4.12	5.82	1.52	0.64	48.7	265.5	18.5	12.1	14.2	95.8	1.62	0.01	5.47	9.4	8.7	5.04	7.25	152	13	69.6	43.6			0	300	0	152	1	0	1	1	1	0	0	1
0	35	0	134	80	86	28	0	0	2	0	0	1	0	0	4.3	2.07	2.71	0.93	93.1	392.8	24.2	23.3	27.7	126.8	3.01	0.003	230.7	5.12	6.61	4.8	6.25	147	12.9	67.5	45.8	9.6	23.2	25	0	15	145	0	1	1	1	1	0	0	1
0	34	0	170	110	89	37	1	0	4	1	0	0	1	0	4.65	2.39	3.26	0.7	104.3	700.2	43.8	29.5	15	202.5	4.35	0.521	139	4.58	5.2	5.58	12.77	248	12.6	76.4	42.4	2.7	79.4	0	0	0	152	1	1	1	1	1	0	1	1
0	45	0	157	83	73	22	0	0	2	1	1	1	0	0	5.43	1.39	3.84	1.13	66	264.7	43.3	30.1	21	80.4	1.75	0.038	153	5.12	5.4	4.82	5.69	217	13.4	76.6	48.3	6.1	72.2	10	0	0	161	0	1	1	1	1	0	0	1
0	45	0	126	84	96	28	0	1	3	0	0	0	0	0	4.25	1.12	2.53	1.54	80	219.5	44	153.1	23.2	1344.5	79.67	1.08	2537	6.63	5.6	4.32	9.27	189	12	74.1	41.6	7.4	32.8	20	0	0	149	0	1	1	1	1	0	0	1
0	44	0	87	68	104	32	0	1	3	1	1	0	1	0	4.2	1.87	2.61	0.93	144.1已复查	287.7	63.4	197.1已复查	13.5	1808.9	168.8	2.42	5841	8.81	6.71	4.65	10.2	269	12.5	72.3	38.5	3.8	75.2	0	0	0	143	0	0	1	1	1	1	0	1
0	39	0	114	82	64	24	0	1	3	1	1	0	0	0	4.2	1.75	2.94	0.63	89.6	332.4	99.8	36.7	6.1	84.7	10.3	0.05	381.5	4.63	5.2	4.46	5.06	203	11.4	64.5	43.8	1.8	82.4	0	0	5	138	0	1	1	1	1	0	0	1
0	43	1	124	66	78	19	1	0	4	0	0	0	0	0	5.37	1.05	3.65	1.41	55.8	180.5	30.5	14.4	8.8	50.2	1.71	0.005	700.1	5.53	5.3	4.28	5.53	357	12.7	67	42.3	2.1	20.7	0	0	0	132	0	1	1	1	1	0	0	1
0	41	0	110	63	131	24	0	1	3	1	1	0	0	0	5.1	2.6	2.69	1.47	76.5	381.9	128.9	611.7	31.1	4875.8	250.7	4.64	5307	8.43	6	5.46	17.77	218	12.9	62.8	37.5	7.3	158.4					0	1	1	1	1	0	0	1
0	40	0	170	79	77	30	0	0	2	0	0	0	1	0	4.1	2.07	2.51	0.93	80.9	532.7	47.4	23.4	17.4	128.3	1.98	0.012	127	6.15	6.42	5.07	8.05	207	12.8	65.9	42.7	4.7	27				148	0	0	1	1	1	0	0	1
0	36	0	106	78	90	25	0	1	3	0	0	0	0	0	3.73	2.69	2.06	0.8	115.2	437.9	33.5	18.1	18.2	55.8	11.5	0.233	2567	5.05	6.52	4.58	6.2	133	12.4	68.5	42.4	5	24.7	20	0	0	148	0	1	1	1	1	0	0	1
0	35	0	120	80	80	27	1	0	4	1	1	0	0	0	4.3	1.87	2.71	0.93	82.9	385.4	32.9	25.5	13.1	131.3	4.78	0.766	172.5	4.28	6.62	5.7	5.35	178	13.4	69.9	42.1	4	24	0	0	0	175	0	1	1	1	1	0	0	1
0	44	0	127	90	89	29	0	0	2	1	1	1	1	0	4.95	1.29	3.1	1.29	68.3	274.8	32.3	17.5	7.6	116.3	40.14	1.49		7.89	6.72	5.1	8.48	241	12.6	74	43.4	2.3	57	0	100	0	162	0	0	1	1	1	0	0	1
[truncated: 77 more columns]
